# Supplementary material for: Novel RNA Viruses from the Transcriptome of Pheromone Glands in the Pink Bollworm Moth, Pectinophora gossypiella
Source: MDPI journal article supplement (doi:10.3390/insects12060556), 2021-06-15
Supplement: s1 [file s1]

**S1 Table. Viruses found in Lab population**

| Lab population       | nt   | aa   | Fu ll? | GenBank description                                                         | Identity (%) | Access number | Type      | Potential source |
|----------------------|------|------|--------|-----------------------------------------------------------------------------|--------------|---------------|-----------|------------------|
| Contig1              | 2153 | 345  | N      | L polymerase RdRp [Formica fusca virus 1]                                   | 32.83        | AYW51538      | (-ss)RNA  | Host genome      |
| Contig2 (PecgV1)     | 9677 | 2948 | Y      | polyprotein [Helicoverpa armigera iflavivirus]                              | 78.25        | YP_009344960  | (+ss)RNA  | Virus            |
| Contig3 (PecgV2)     | 6419 | 2093 | Y      | RNA-dependent RNA polymerase [Seattle Precang virus]                        | 62.05        | AOF41423      | (-ss)RNA  | Virus            |
| Contig4 (PecgV3-L)   | 7827 | 2502 | Y      | RNA-dependent RNA polymerase [Hubei lepidoptera virus 1]                    | 33.26        | YP_009330283  | (-ss)RNA  | Virus            |
| Contig5 (PecgV3-S)   | 2362 | 276  | Y      | putative nucleoprotein [Hubei lepidoptera virus 1]                          | 31.49        | YP_009330256  | (-ss)RNA  | Virus            |
| Contig6 (PecgV3-M)   | 5042 | 1558 | Y      | putative glycoprotein [Hubei lepidoptera virus 1]                           | 27.73        | YP_009330257  | (-ss)RNA  | Virus            |
| Contig7 (PecgV4)     | 9782 | 2846 | Y      | hypothetical protein [Wuhan insect virus 13]                                | 37.36        | YP_009342321  | (+ss)RNA  | Virus            |
| Contig8              | 1009 | 259  | Y      | hypothetical protein B5V51_1641 [Heliothis virescens]                       | 34.46        | PCG71644      | dsDNA     | Host genome      |
| Contig9              | 2059 | 256  | Y      | orf10-like protein [Peridroma alphabaculovirus]                             | 30.4         | YP_009049835  | dsDNA     | Host genome      |
| Contig10             | 1784 | 437  | Y      | ORF61 [Xestia c-nigrum granulovirus]                                        | 27.89        | NP_059209     | dsDNA     | Host genome      |
| Contig11             | 1439 | 257  | Y      | orf10-like protein [Peridroma alphabaculovirus]                             | 27.73        | YP_009049835  | dsDNA     | Host genome      |
| Contig12             | 765  | 170  | Y      | unknown similar to MacoNPV-B orf57 [Choristoneura biennis entomopoxvirus]   | 31.34        | YP_008004381  | dsDNA     | Host genome      |
| Contig13             | 791  | 231  | N      | cathepsin-like protein [Helicoverpa armigera nucleopolyhedrovirus]          | 50.45        | AIY24949      | dsDNA     | Virus            |
| Contig14             | 758  | 130  | N      | cathepsin-like cysteine proteinase [Spodoptera litura nucleopolyhedrovirus] | 46.88        | NP_258322     | dsDNA     | Virus            |
| Contig15             | 1056 | 144  | N      | cathepsin [Helicoverpa armigera nucleopolyhedrovirus G4]                    | 46.81        | NP_075125     | dsDNA     | Virus            |
| Contig16             | 1249 | 353  | N      | cathepsin [Choristoneura fumiferana multiple nucleopolyhedrovirus]          | 47.57        | XP_028167656  | dsDNA     | Unknown          |
| Contig17             | 1811 | 552  | N      | uncharacterized protein LOC114355158 [Ostrinia furnacalis]                  | 37.45        | XP_028163655  | (-ss) RNA | Host genome      |
| Contig 18 (PecgV2-M) | 2446 | 724  | Y      | glycoprotein precursor [Seattle Precang virus]                              | 42.47        | YP_009666958  | (-ss) RNA | Virus            |

|                         |      |     |   |                                          |       |                  |           |       |
|-------------------------|------|-----|---|------------------------------------------|-------|------------------|-----------|-------|
| Contig 19<br>(PecgV2-S) | 1701 | 252 | Y | nucleocapsid [Seattle Prectang<br>virus] | 56.74 | YP_0096669<br>60 | (-ss) RNA | Virus |
|-------------------------|------|-----|---|------------------------------------------|-------|------------------|-----------|-------|
