# Supplementary material for: Novel RNA Viruses from the Transcriptome of Pheromone Glands in the Pink Bollworm Moth, Pectinophora gossypiella
Source: MDPI journal article supplement (doi:10.3390/insects12060556), 2021-06-15
Supplement: s1 [file s1]

**S2 Table. Viruses found in Field population**

| Field Population    | nt    | aa   | Full ? | GenBank description                                                         | Identity(%) | Access       | Type     | Potential source |
|---------------------|-------|------|--------|-----------------------------------------------------------------------------|-------------|--------------|----------|------------------|
| Contig1             | 754   | 189  | N      | unknown similar to MacoNPV-B orf57 [Choristoneura biennis entomopoxvirus]   | 30.88       | YP_008004381 | dsDNA    | Unknown          |
| Contig2             | 861   | 136  | N      | cathepsin-like cysteine proteinase [Spodoptera litura nucleopolyhedrovirus] | 46.62       | NP_258322    | dsDNA    | Unknown          |
| Contig3             | 593   | 191  | N      | transposase mut [Lambdina fiscellaria nucleopolyhedrovirus]                 | 49.73       | YP_009133324 | dsDNA    | Unknown          |
| Contig4             | 1288  | 333  | N      | zingipain-2-like [Ostrinia furnacalis]                                      | 46.25       | XP_028167656 | dsDNA    | Unknown          |
| Contig5             | 776   | 226  | N      | cathepsin-like protein [Helicoverpa armigera nucleopolyhedrovirus]          | 50.45       | AIY24949     | dsDNA    | Unknown          |
| Contig6             | 1390  | 376  | N      | hypothetical protein [Samia ricini nucleopolyhedrovirus]                    | 33.67       | BBD51232     | dsDNA    | Unknown          |
| Contig7             | 631   | 164  | N      | Mabr_orf10 [Mamestra brassicae multiple nucleopolyhedrovirus]               | 32.7        | AFP95729     | dsDNA    | Unknown          |
| Contig8 (PecgV1)    | 10063 | 2948 | N      | polyprotein [Helicoverpa armigera iflavivirus]                              | 79          | YP_009344960 | (+ss)RNA | Virus            |
| Contig9 (PecgV2)    | 6423  | 2093 | Y      | RNA-dependent RNA polymerase [Seattle Prectang virus]                       | 62          | AOF41423     | (-ss)RNA | Virus            |
| Contig10 (PecgV3-S) | 2352  | 276  | Y      | putative nucleoprotein [Hubei lepidoptera virus 1]                          | 31.49       | YP_009330256 | (-ss)RNA | Virus            |
| Contig11 (PecgV3-M) | 5115  | 1559 | Y      | putative glycoprotein [Hubei lepidoptera virus 1]                           | 26.86       | YP_009330257 | (-ss)RNA | Virus            |
| Contig12 (PecgV3-L) | 7762  | 2502 | Y      | RNA-dependent RNA polymerase [Hubei lepidoptera virus 1]                    | 35          | YP_009330283 | (-ss)RNA | Virus            |
| Contig13 (PecgV4)   | 9711  | 2846 | N      | hypothetical protein [Wuhan insect virus 13]                                | 37          | YP_009342321 | (+ss)RNA | Virus            |
| Contig14            | 948   | 257  | Y      | orf10-like protein [Peridroma alphabaculovirus]                             | 28          | YP_009049835 | dsDNA    | Host genome      |
| Contig15            | 2164  | 256  | Y      | unknown [Antheraea pernyi nucleopolyhedrovirus]                             | 27          | ABQ12247     | dsDNA    | Host genome      |
| Contig16            | 1710  | 437  | Y      | ORF61 [Xestia c-nigrum granulovirus]                                        | 27          | NP_059209    | dsDNA    | Host genome      |
| Contig17            | 2215  | 204  | Y      | transposase mut [Lambdina fiscellaria nucleopolyhedrovirus]                 | 46          | YP_009133324 | dsDNA    | Host genome      |
| Contig18            | 4219  | 574  | N      | L polymerase RdRp [Formica fusca virus 1]                                   | 52          | AYW51538     | (-ss)RNA | Virus            |
| Contig 19           | 2325  | 532  | Y      | uncharacterized protein LOC114355158 [Ostrinia furnacalis]                  | 37.8        | XP_028163655 | (-ss)RNA | Host genome      |

|                         |      |     |   |                                                    |       |                  |          |       |
|-------------------------|------|-----|---|----------------------------------------------------|-------|------------------|----------|-------|
| Contig 20<br>(PecgV2-M) | 2489 | 725 | Y | glycoprotein precursor [Seattle<br>Prectang virus] | 42.47 | YP_009<br>666958 | (-ss)RNA | Virus |
| Contig 21<br>(PecgV2-S) | 1715 | 365 | Y | nucleocapsid [Seattle Prectang<br>virus]           | 56.74 | YP_009<br>666960 | (-ss)RNA | Virus |
